# Supplementary material for: Effects of substrate stiffness on the viscoelasticity and migration of prostate cancer cells examined by atomic force microscopy
Source: publisher site journal article supplement (doi:10.3762/bjnano.13.47), 2022-06-28
Supplement: Additional file 1 [file 2190-4286-13-47-S1.pdf]

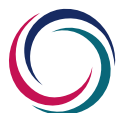

## Supporting Information

for

### **Effects of substrate stiffness on the viscoelasticity and migration of prostate cancer cells examined by atomic force microscopy**

Xiaoqiong Tang, Yan Zhang, Jiangbing Mao, Yuhua Wang, Zhenghong Zhang, Zhengchao Wang and Hongqin Yang

*Beilstein J. Nanotechnol.* **2022**, *13*, 560–569. doi:10.3762/bjnano.13.47

## Additional figures

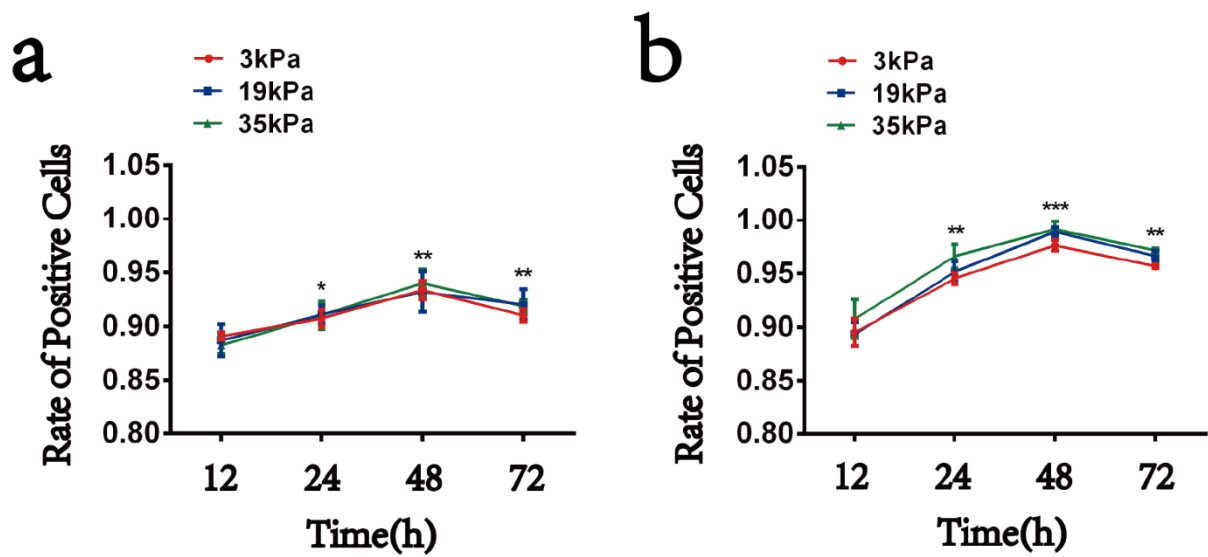

**Figure S1:** The toxic effect of polyacrylamide hydrogel substrates on prostate cancer cells. (a,b) Ratio of Calcein-AM/PI labelled HPV-PZ-7 and PC-3 cells, respectively.

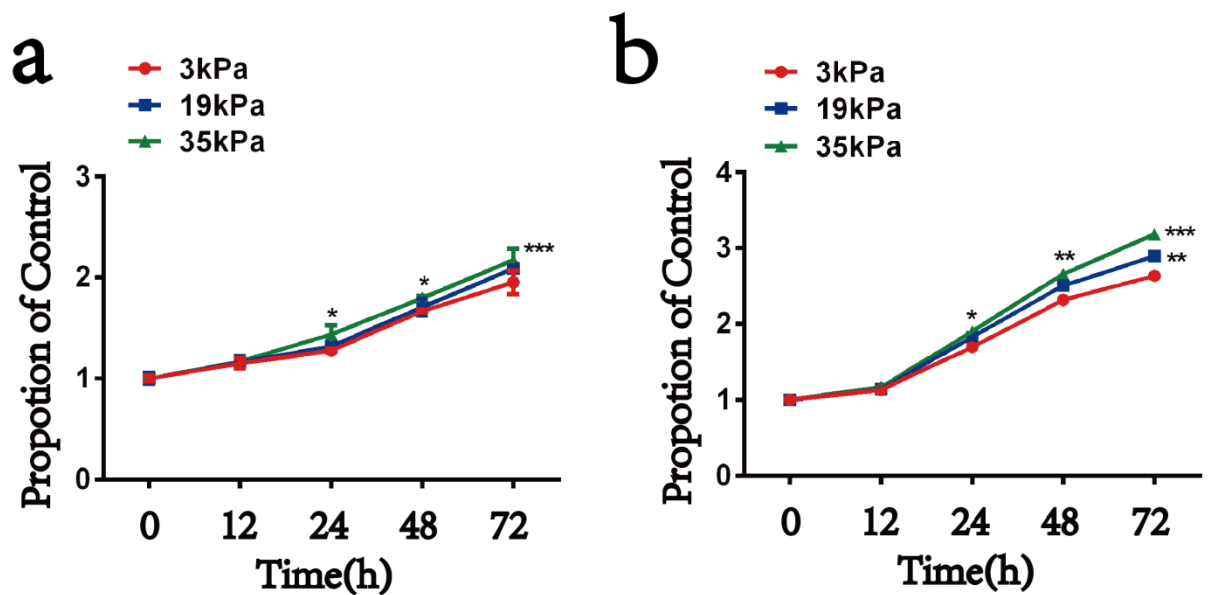

**Figure S2:** The effect of substrate stiffness on cell proliferation. (a,b) CCK-8 detects proliferation of HPV-PZ-7 and PC-3 cells. The proliferation rate of cells plated on 19 and 35 kPa was compared to that of cells plated on at 3 kPa substrates.

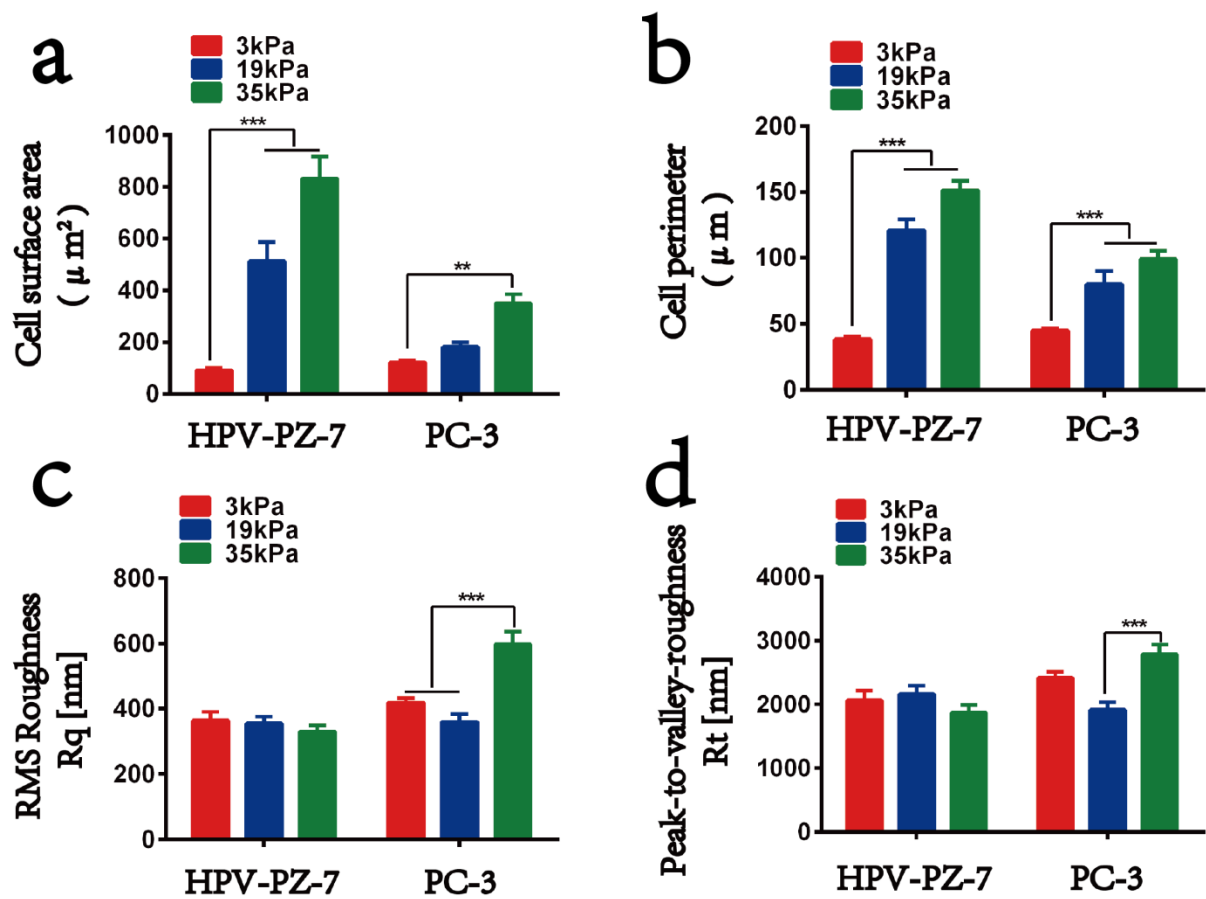

**Figure S3:** The effect of substrate stiffness on cell morphology. (a) Phase-contrast microscopy imaging of PZ-HPV-7 and PC-3 cells on different stiffness substrates were used to obtain measurements of cell area. (b) Measurements of cell perimeter. (c) Atomic force microscopy imaging of HPV-PZ-7 and PC-3 cells on substrates with different stiffness was used to obtain measurements of the root mean square surface roughness (Rq). (d) Measurements of peak-to-valley ratio roughness (Rt). \*\*  $p < 0.01$ , \*\*\*  $p < 0.001$ .

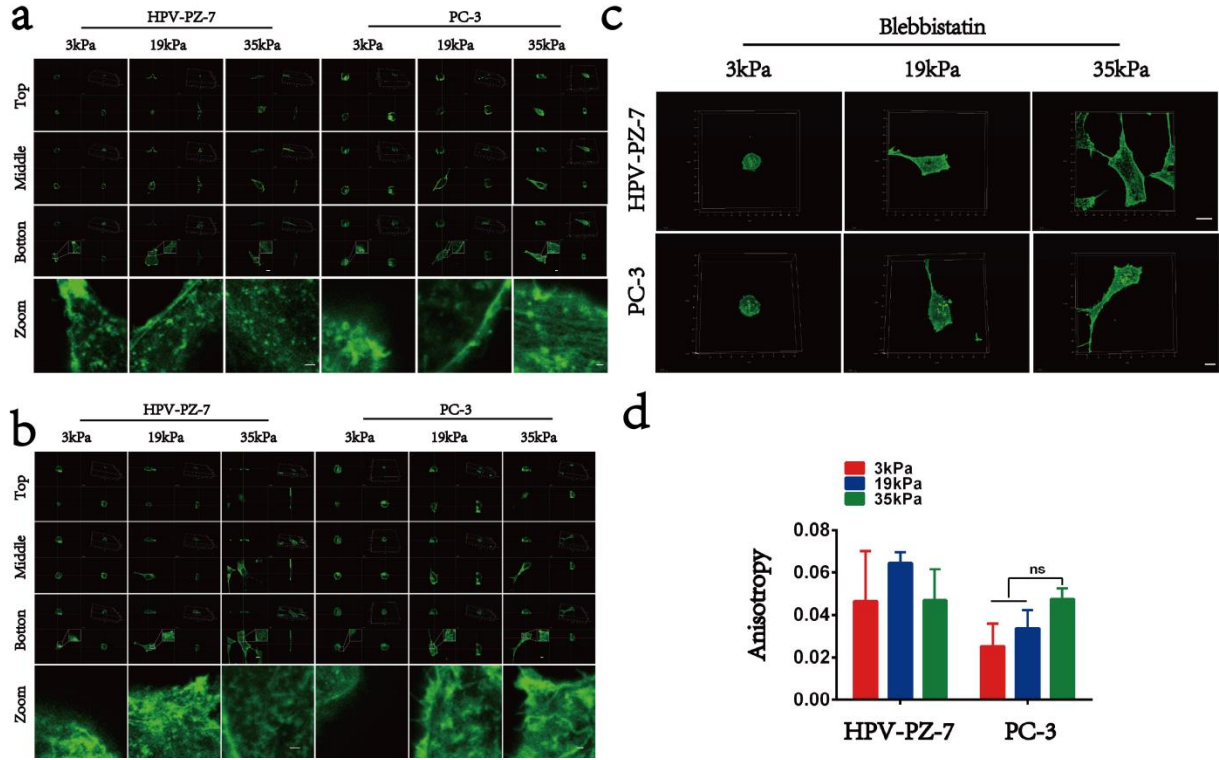

**Figure S4:** The effect of blebbistatin on PCa cytoskeleton microfilaments. (a) Three-dimensional fluorescence images of cytoskeletal microfilaments of HPV-PZ-7 and PC-3 cells on substrates with different stiffness. The zoomed image in the top right corner is a 2.5 $\times$  enlargement of an area taken from the original image with a size of  $2.2 \times 2.2$ . The scale bar of HPV-PZ-7 cells is 20  $\mu\text{m}$  and the scale bar of PC-3 cells is 10  $\mu\text{m}$ . (b) Three-dimensional fluorescence images of cytoskeletal microfilaments of HPV-PZ-7 and PC-3 cells on substrates with different stiffness after blebbistatin treatment. (c) The fluorescence images of HPV-PZ-7 and PC-3 cytoskeletal microfilaments on substrates with different stiffness after blebbistatin treatment; the scale bar of HPV-PZ-7 cells is 20  $\mu\text{m}$ , and the scale bar of PC-3 cells is 10  $\mu\text{m}$ . (d) Anisotropy quantification maps of the fibrillar structure of HPV-PZ-7 and PC-3 cells on substrates with different stiffness after blebbistatin treatment; "ns" means no difference.

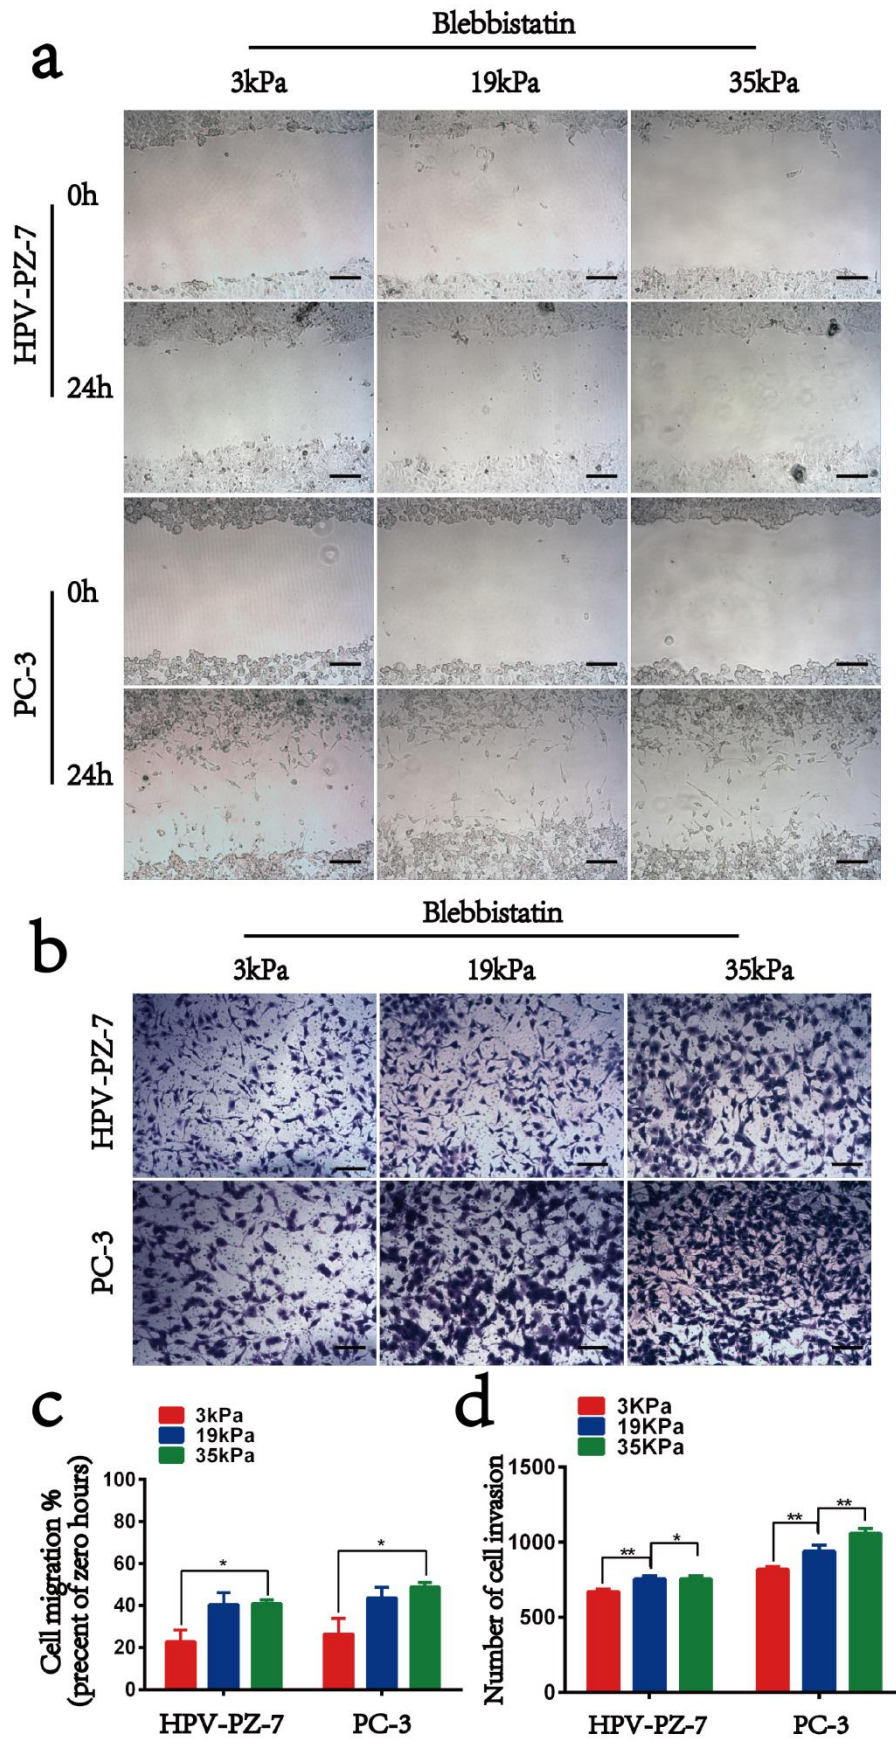

**Figure S5:** The effect of blebbistatin on PCa cell migration. (a) Cell wound healing analysis of the migration ability of HPV-PZ-7 and PC-3 cells on substrates with different

stiffness after blebbistatin treatment. (b) Analysis of transwell invasion ability of HPV-PZ-7 and PC-3 cells on substrates with different stiffness after blebbistatin treatment. (c) Quantitative analysis of the migration ability of HPV-PZ-7 and PC-3 cells on substrates with different stiffness after blebbistatin treatment. (d) Quantitative analysis of the invasion ability of HPV-PZ-7 and PC-3 cells on substrates with different stiffness after blebbistatin treatment. \*  $P < 0.05$ , \*\*  $P < 0.01$ , \*\*\*  $P < 0.001$ .

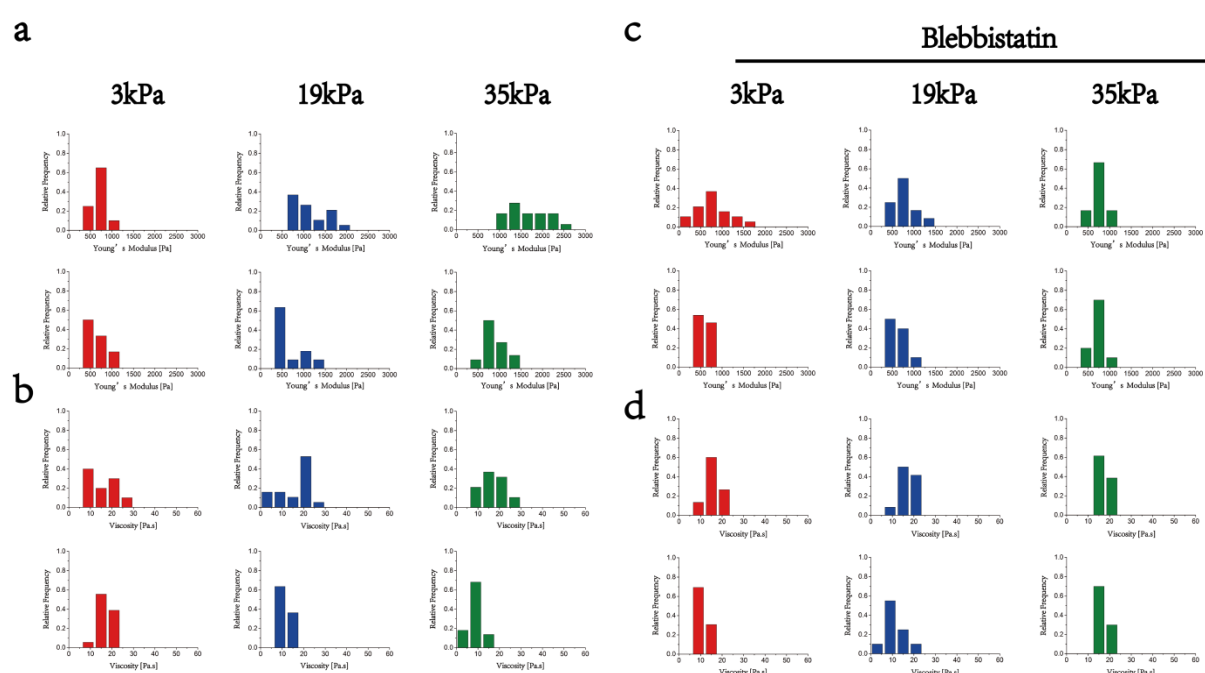

**Figure S6:** Mechanical properties respond to the effect of substrate stiffness on prostate cancer cells. (a) Histograms of the elastic frequency distribution of HPV-PZ-7 and PC-3 cells on substrates with different stiffness. (b) Histograms of the viscosity frequency distribution of HPV-PZ-7 and PC-3 cells on substrates with different stiffness. (c) Histogram of elastic frequency distribution of HPV-PZ-7 and PC-3 cells on substrates with different stiffness after blebbistatin treatment. (d) Histogram of the viscosity frequency distribution of HPV-PZ-7 and PC-3 cells on substrates with different stiffness after blebbistatin treatment.
